# Supplementary material for: Development and Validation of a Sulfa Antibiotic Allergy Clinical Decision Rule
Source: PubMed Central journal article supplement (PMC10242418; doi:10.1001/jamanetworkopen.2023.16776), 2023-06-05
Supplement: jamanetwopen-e2316776-s001.pdf [file jamanetwopen-e2316776-s001.pdf]

## Supplementary Online Content

Waldron JL, Rose M, Vogrin S, et al. Development and validation of a sulfa antibiotic allergy clinical decision rule. *JAMA Netw Open*. 2023;6(6):e2316776.  
doi:10.1001/jamanetworkopen.2023.16776

### **eMethods.**

**eFigure.** PEN-FAST Penicillin Allergy Clinical Decision Rule, Adapted From “Development and Validation of a Penicillin Allergy Clinical Decision Rule” by Trubiano, et al

**eTable.** Criteria for Challenge Type and Corresponding Doses in Both Australia and USA Cohorts. Adapted From Krantz, et al

This supplementary material has been provided by the authors to give readers additional information about their work.

## **eMethods**

### ***Statistical analysis***

All available data was used for analysis, no prior sample size calculations were performed.

Univariable and multivariable logistic regression was performed using each PEN-FAST component.

Total score using PEN-FAST scoring algorithm (eFigure I) was calculated and diagnostic performance is presented for each cohort (sensitivity, specificity, positive and negative predictive value, AUC).

Additional analysis included stratification by allergy phenotype. Results are reported in accordance to STROBE guidelines.<sup>6</sup> This study was approved by the institutional review board and the human research ethics committees at Vanderbilt University Medical Center (161455) and Austin Health (HREC/15/AUSTIN/75 & HREC/47585/Austin-2018), respectively.

**eFigure.** PEN-FAST Penicillin Allergy Clinical Decision Rule, Adapted From “Development and Validation of a Penicillin Allergy Clinical Decision Rule” by Trubiano, *et al*

| <b>PEN</b>                      | Penicillin allergy reported by patient                                                                         | <input type="checkbox"/> If yes, proceed with assessment |
|---------------------------------|----------------------------------------------------------------------------------------------------------------|----------------------------------------------------------|
| <b>F</b>                        | Five years or less since reaction <sup>a</sup>                                                                 | <input type="checkbox"/> 2 points                        |
| <b>A</b>                        | Anaphylaxis or angioedema                                                                                      | <input type="checkbox"/> 2 points                        |
| <b>S</b>                        | Severe cutaneous adverse reaction <sup>b</sup>                                                                 |                                                          |
| <b>T</b>                        | Treatment required for reaction <sup>a</sup>                                                                   | <input type="checkbox"/> 1 point                         |
|                                 |                                                                                                                | <hr/>                                                    |
|                                 |                                                                                                                | <input type="checkbox"/> Total points                    |
| Interpretation                  |                                                                                                                |                                                          |
| <input type="checkbox"/> Points |                                                                                                                |                                                          |
| <input type="checkbox"/> 0      | <b>Very low risk</b> of positive penicillin allergy test <1% (<1 in 100 patients reporting penicillin allergy) |                                                          |
| <input type="checkbox"/> 1-2    | <b>Low risk</b> of positive penicillin allergy test 5% (1 in 20 patients)                                      |                                                          |
| <input type="checkbox"/> 3      | <b>Moderate risk</b> of positive penicillin allergy test 20% (1 in 5 patients)                                 |                                                          |
| <input type="checkbox"/> 4-5    | <b>High risk</b> of positive penicillin allergy test 50% (1 in 2 patients)                                     |                                                          |

The PEN-FAST clinical decision rule for patients reporting a penicillin allergy uses 3 clinical criteria of time from penicillin allergy episode, phenotype, and treatment required. A total score is calculated using PEN-FAST score in the upper panel, and interpretation for risk strategy is provided in the lower panel.

<sup>a</sup> Includes unknown.

<sup>b</sup> Forms of severe delayed reactions include potential Stevens-Johnson syndrome, toxic epidermal necrolysis, drug reaction with eosinophilia and systemic symptoms, and acute generalized exanthematous pustulosis. Patients with a severe delayed rash with mucosal involvement should be considered to have a severe cutaneous adverse reaction. Acute interstitial nephritis, drug induced

liver injury, serum sickness and isolated drug fever were excluded phenotypes from the derivation and validation cohorts.

**eTable.** Criteria for Challenge Type and Corresponding Doses in Both Australia and USA Cohorts.

Adapted From Krantz, *et al*

| Challenge Type        | Criteria                                                                                                                                                                                                                                                                                                                                                                                                                                                                                                                                  | Dose(s)                                                                          | Observation Protocol*                                                                                                          |
|-----------------------|-------------------------------------------------------------------------------------------------------------------------------------------------------------------------------------------------------------------------------------------------------------------------------------------------------------------------------------------------------------------------------------------------------------------------------------------------------------------------------------------------------------------------------------------|----------------------------------------------------------------------------------|--------------------------------------------------------------------------------------------------------------------------------|
| Single-dose challenge | <p>Nonsevere delayed reactions without multiple features consistent with IgE-mediated reaction</p> <p>Nonsevere immediate (eg, isolated urticaria, maculopapular rash, or gastrointestinal symptoms) reaction (&lt;1 hr) more than 5 years ago</p> <p>Unknow, remote history</p>                                                                                                                                                                                                                                                          | TMP-SMX (Co-T) 80-400mg                                                          | 1-2 hr observation in clinic after full dose                                                                                   |
| 2-dose challenge      | <p>Nonsevere immediate reaction (&lt;1 h) within past 5 years</p> <p>Nonsevere accelerated reaction (&gt;1 but &lt;36 h) within the past 5 y</p> <p>Anaphylaxis at any time point in the past</p> <p>Multiple (2 or more) features potentially compatible with IgE-mediated reaction at any time point in the past</p> <ul style="list-style-type: none"> <li>• Urticaria</li> <li>• Angioedema</li> <li>• Shortness of breath</li> <li>• Hypotension</li> <li>• Significant patient anxiety surrounding single-dose challenge</li> </ul> | <p>TMP-SMX (Co-T) 8-40 mg</p> <p>TMP- SMX (Co-T) 80-400 mg</p>                   | <p>30 min to 1 hr observation in clinic after first dose</p> <p>1 hr to 2 hr observation in clinic after second, full dose</p> |
| Prolonged challenge   | Nonsevere delayed reaction (>36 h) at any time point in past                                                                                                                                                                                                                                                                                                                                                                                                                                                                              | <p>TMP-SMX (Co-T) 80-400mg</p> <p>TMP-SMX (Co-T) 160-800 mg daily for 3 days</p> | 1 hr observation for single dose challenge in clinic, follow up call 24-48 hours after completion of 3 day outpatient course   |

\*Routine observation protocol varies based on individual clinic location
