# Supplementary material for: Development and Validation of a Sulfa Antibiotic Allergy Clinical Decision Rule
Source: PubMed Central journal article supplement (PMC10242418; doi:10.1001/jamanetworkopen.2023.16776), 2023-06-05
Supplement: jamanetwopen-e2316776-s002.pdf [file jamanetwopen-e2316776-s002.pdf]

## **Data Sharing Statement**

Waldron. Development and Validation of a Sulfa Antibiotic Allergy Clinical Decision Rule. *JAMA Netw Open*. Published June 05, 2023. doi:10.1001/jamanetworkopen.2023.16776

### **Data**

**Data available:** No
